# Supplementary material
Source: PubMed Central journal article supplement (PMC8054025)
Supplement: pnas.2022269118.sapp.pdf [file pnas.2022269118.sapp.pdf]

## **Supplementary Information for**

### **Structural Basis for GTP-induced Dimerization and Antiviral Function of Guanylate-binding Proteins**

Wen Cui<sup>#</sup>, Elisabeth Braun<sup>#</sup>, Wei Wang<sup>#</sup>, Jinhong Tang<sup>#</sup>, Yanyan Zheng<sup>#</sup>, Benjamin Slater, Na Li, Cheng Chen, Qingxiang Liu, Bin Wang, Xiu Li, Yinkai Duan, Yunjie Xiao, Ruijiao Ti, Dominik Hotter, Xiaoyun Ji, Lei Zhang, Jun Cui, Yong Xiong, Daniel Sauter<sup>\*</sup>, Zefang Wang<sup>\*</sup>, Frank Kirchhoff<sup>\*</sup>, Haitao Yang<sup>\*</sup>.

<sup>\*</sup>corresponding authors

**Email:** yanght@shanghaitech.edu.cn; frank.kirchhoff@uni-ulm.de; zefangwang@tju.edu.cn; daniel.sauter@med.uni-tuebingen.de

#### **This PDF file includes:**

Figures S1 to S7  
Tables S1 to S2

A

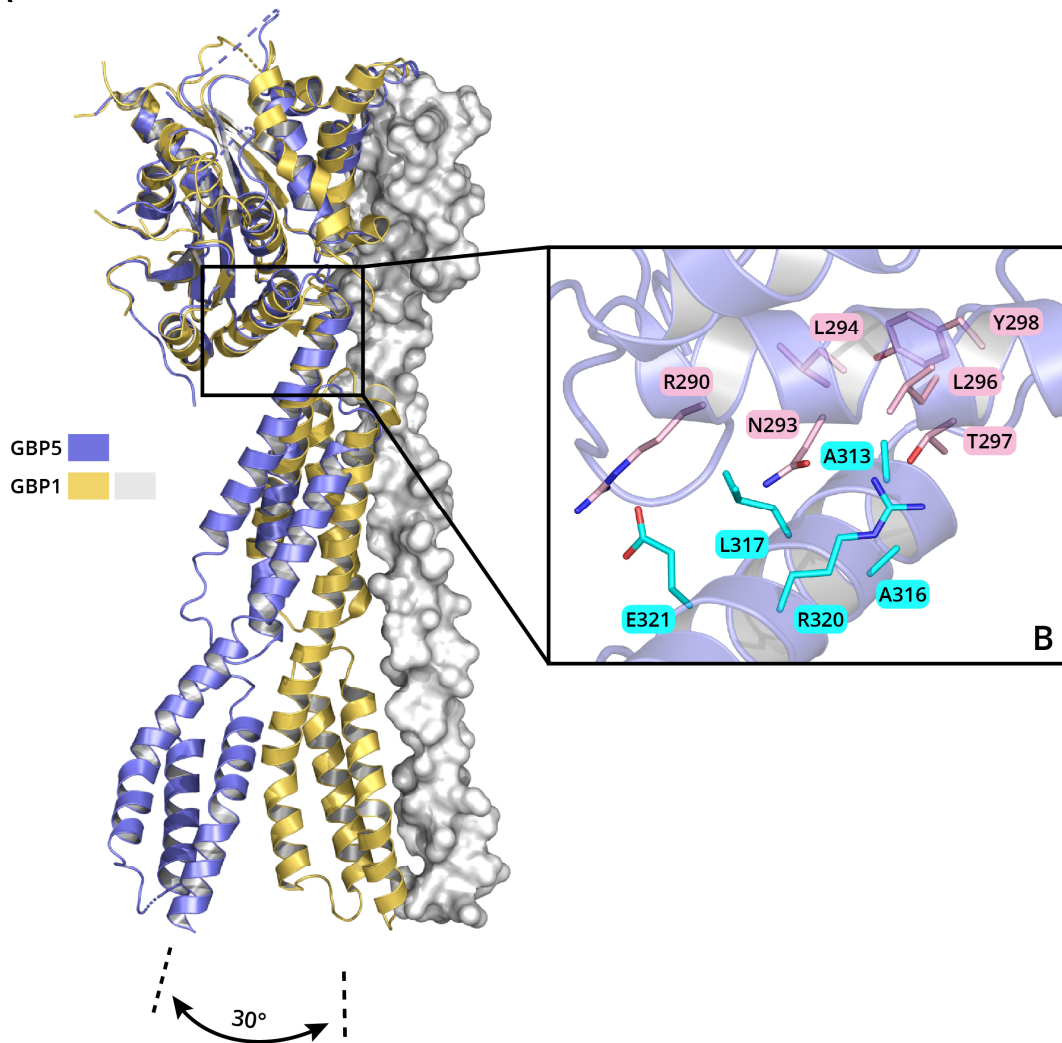

**Fig. S1.** Structural comparison of the monomeric state of hGBP5<sub>1-486</sub> and hGBP1<sup>FL</sup>.

A) Superposing the structures of hGBP5<sub>1-486</sub> (blue) with hGBP1<sup>FL</sup> (PDB: 1DG3, yellow and grey) based on LG domain shows a swing of MD around the hinge region by 30°. The GED of hGBP1<sup>FL</sup> is shown in grey surface. The frame indicates region shown in more detail in panel B). B) The interface between LG domain and MD is shown.

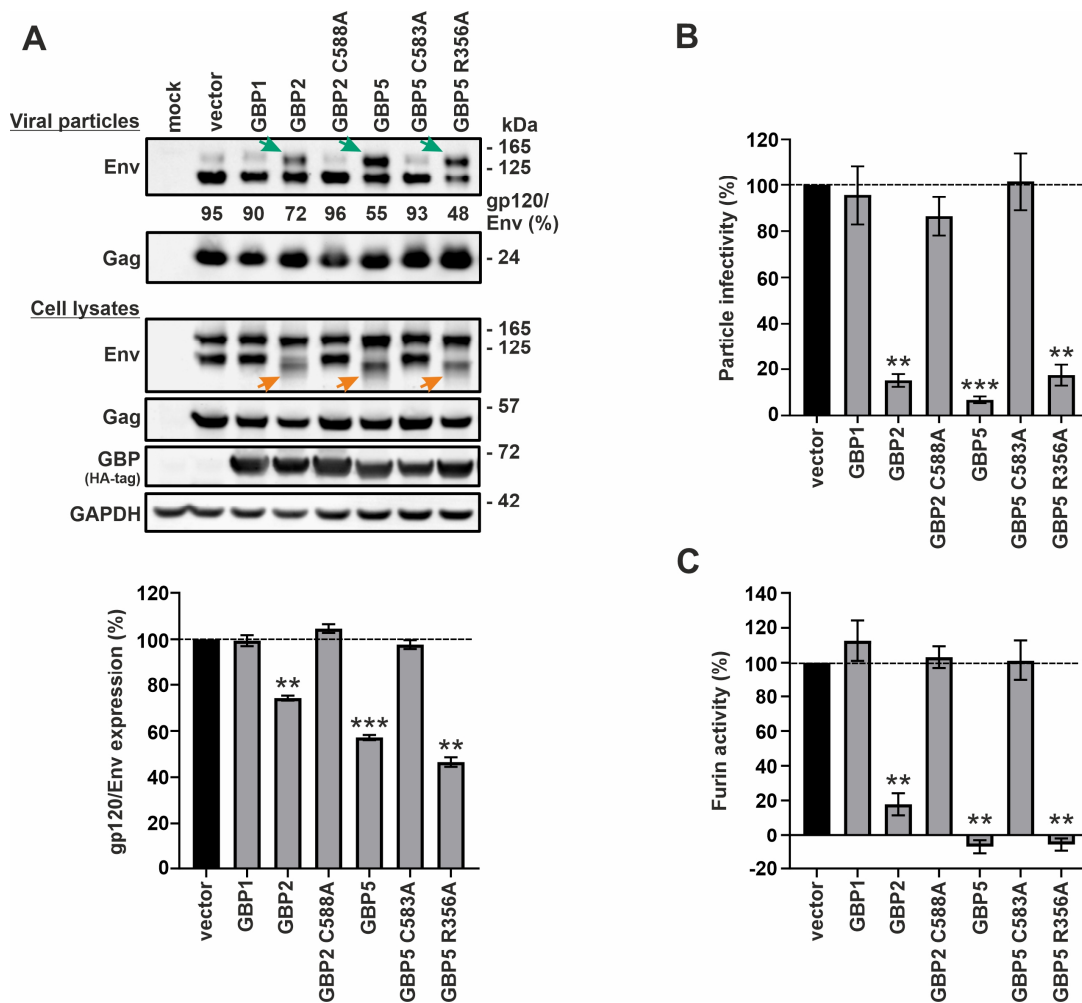

**Fig. S2.** Mutation R356A does not affect the ability of hGBP5 to reduce furin activity, HIV-1 Env processing or HIV-1 particle infectivity.

A) Western blot analysis of HIV-1 Env and Gag in cells and viral particles when HEK293T cells were co-transfected with an HIV-1 proviral construct and various GBPs (upper panel). The C588A and C583A variants represent previously characterized isoprenylation-deficient mutants of hGBP2 and hGBP5, respectively, that fail to restrict HIV-1 (1). They were included as negative controls. Green arrows indicate an increase of unprocessed Env (gp160) in viral particles. Orange arrows indicate a reduced apparent molecular weight of mature processed Env (gp120) in the presence of some GBP variants. The ratio of mature gp120 to total Env in viral particles was quantified and is shown below a representative western blot as well as the mean of three independent experiments (lower panel). B) Infectious HIV-1 yield in the presence of various GBPs was measured by infection of TZM-bl reporter cells and normalized to the amount of HIV-1 capsid (p24) to calculate particle infectivity. C) Furin activity was measured by Pyr-Arg-Thr-Lys-Arg-7-amino-4-methylcoumarin (AMC) cleavage assay upon co-expression with various GBPs.

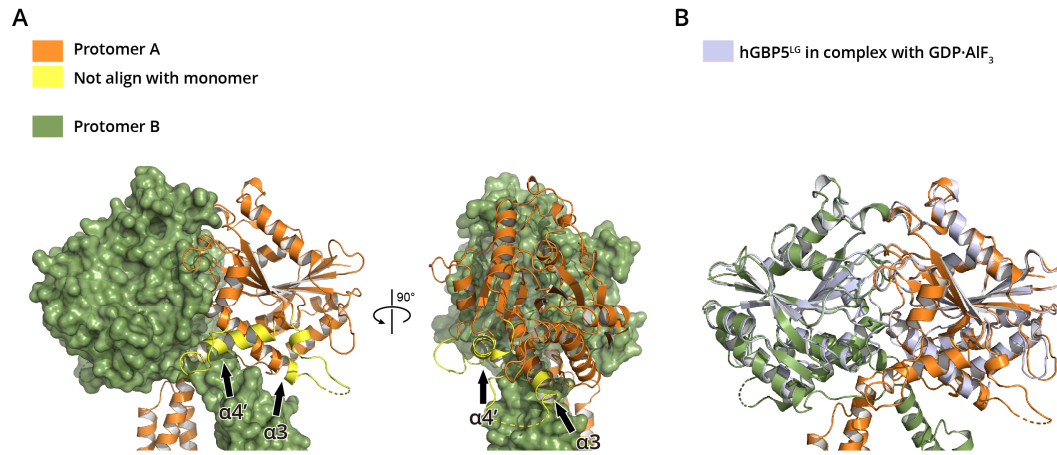

**Fig. S3.** Structural comparison of the LG domains in hGBP5<sup>1-486</sup> dimer and that in hGBP5<sup>L<sup>G</sup></sup> dimer.

A) Two regions at the LG domain which are stabilized by interacting with the MD from the pairing molecule (green) are shown in yellow. B) Superposing the structures of the LG domains in hGBP5<sup>1-486</sup> dimer (orange and green) and hGBP5<sup>L<sup>G</sup></sup> dimer (gray) shows that they are highly similar.



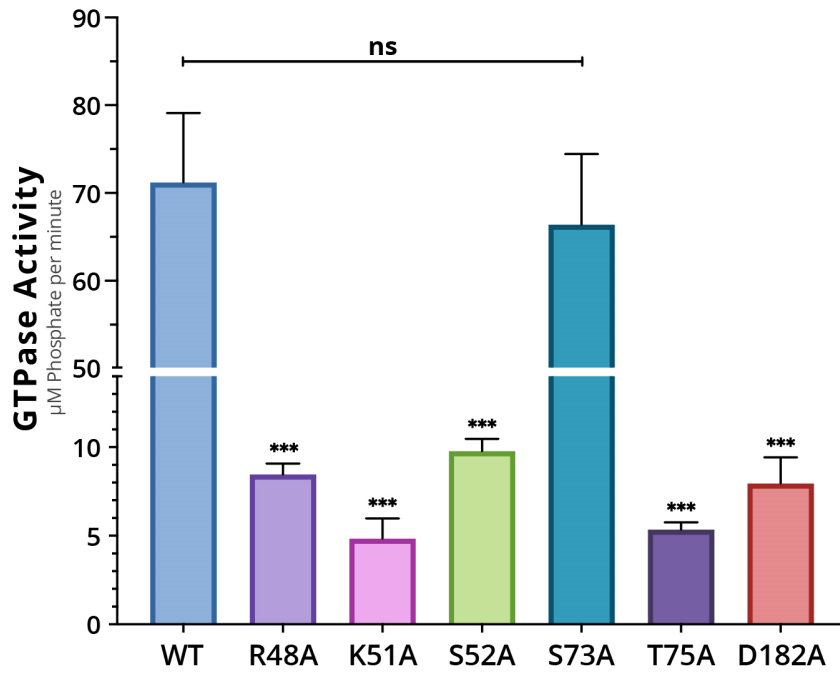

**Fig. S4.** Effects of mutations in the catalytic core on the GTPase activity of hGBP5. GTPase activity of WT and mutant hGBP5 were determined as previously described (2). The assays were performed in triplicate, with mean values and standard deviations plotted. Unpaired t-test was performed between WT and each of hGBP5 mutants. “\*\*\*” indicates  $p < 0.001$  and “ns” indicates  $p > 0.05$ .

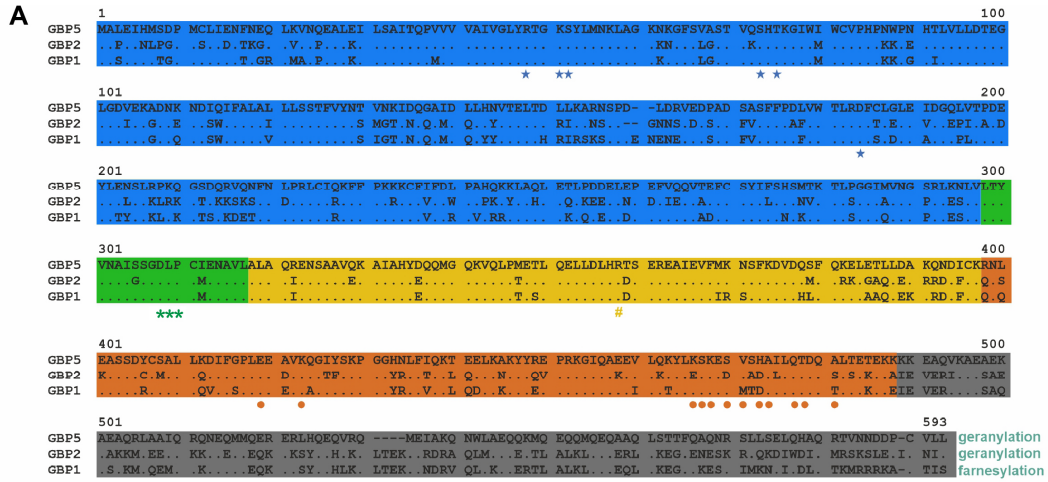

LG domain ■ Hinge ■ MD ■ GED ■

- \* GTPase mutant in GBP5: R48A, K51A, S52A, S73A, T75A, D182A
- \* Hinge mutant in GBP5/GBP2: D306A/D306P, L307A, P308A
- # Crystallization construct mutant in GBP5: R356A
- Dimerization mutant in GBP5: E417A, K421A, K464A, S465A, K466A, S468A, V469A, H471A, A472G, Q475A, T476A, A479G
  - MDDM-A: E417A, K421A
  - MDDM-B: K464A, S465A, K466A, S468A, V469A
  - MDDM-C: H471A, A472G, Q475A, T476A, A479G
  - MDDM-D: K464A, S465A, K466A
  - MDDM-E: E417A, K421A, S468A, H471A
  - MDDM-F: V469A, A472G, Q475A, T476A, A479G

**B**

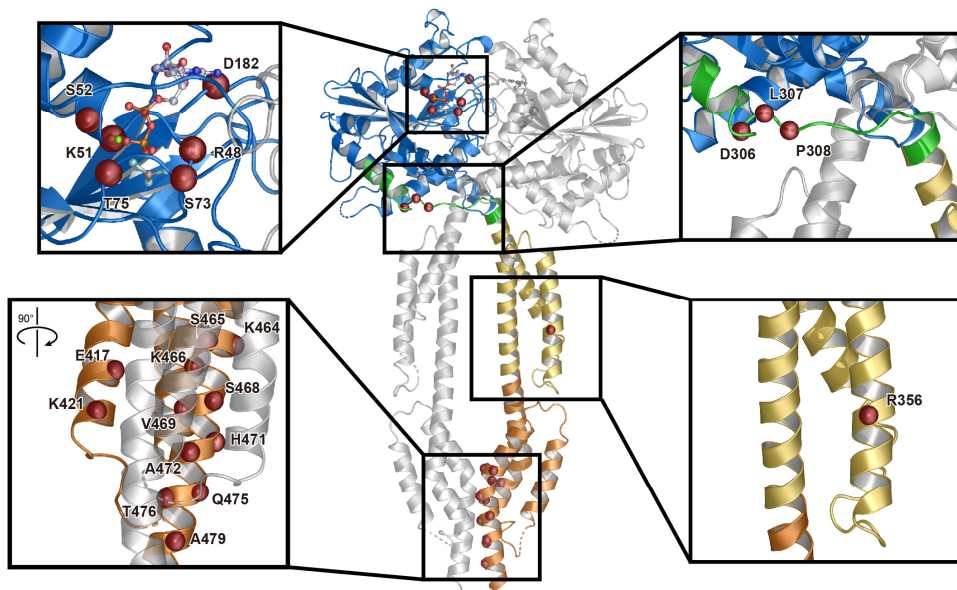

**C**

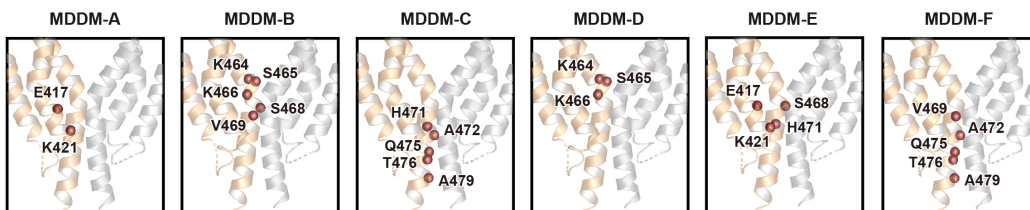

**Fig. S5.** Sequence alignment of hGBP1/2/5 with mutations in different domains marked.

A) Protein sequence alignment of hGBP1, hGBP2 and hGBP5. Dashes indicate gaps that were introduced to improve the alignment. LG domain, hinge region, MD and GED are shaded in blue, green, yellow/orange and grey, respectively. Mutants generated and analyzed in this study are highlighted by symbols below the alignment and listed. B) and C) Positions of mutated residues are shown as spheres in the three-dimensional structure of hGBP5.

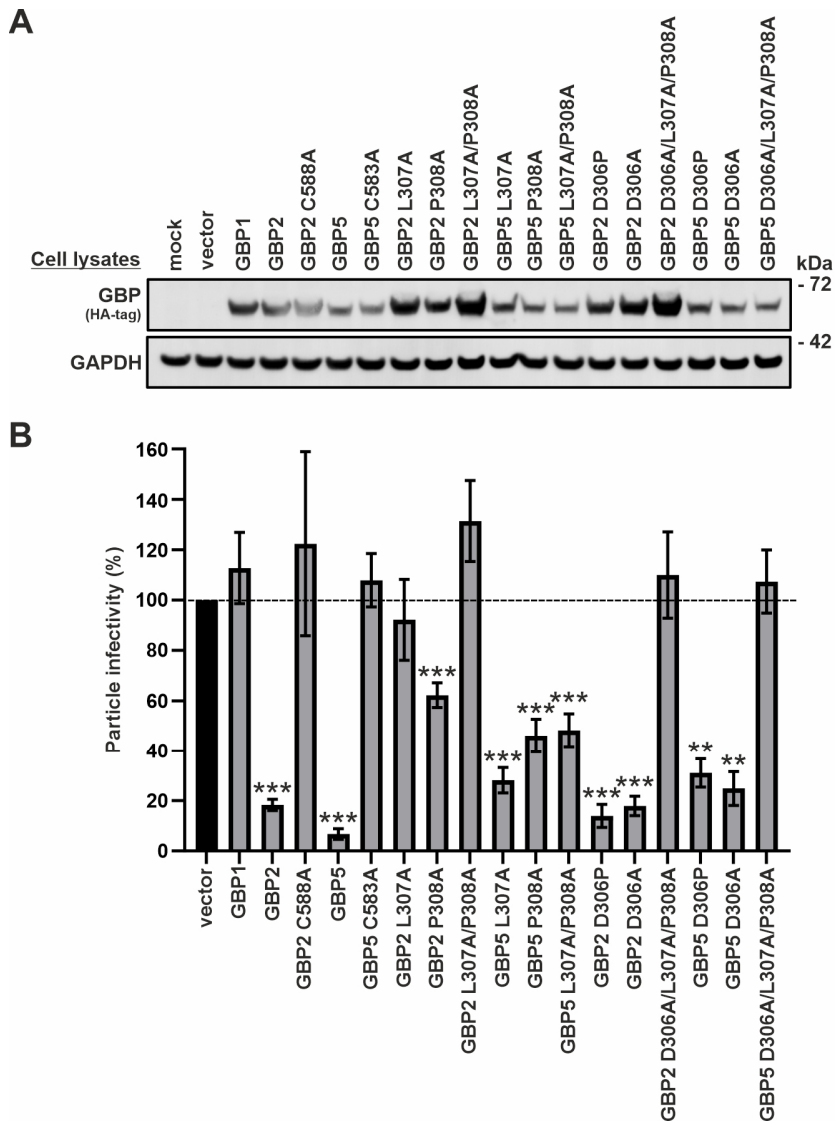

**Fig. S6.** Mutations in the hinge region reduce the antiviral activity of hGBP2 and hGBP5.

A) Western blot analysis of the expression of all GBPs. HEK293T cells were co-transfected with an HIV-1 proviral construct and various GBPs. The C588A and C583A variants represent previously characterized isoprenylation-deficient mutants of hGBP2 and hGBP5, respectively, that fail to restrict HIV-1. They were included as negative controls. B) Infectious HIV-1 yield in the presence of various GBPs. It was determined by infection of TZM-bl reporter cells and normalized to the amount of HIV-1 capsid (p24) to calculate particle infectivity. Mean values of four to seven independent experiments are shown.

**A**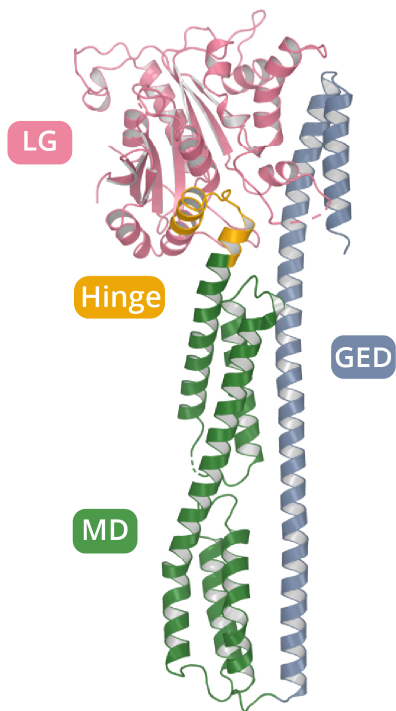**B**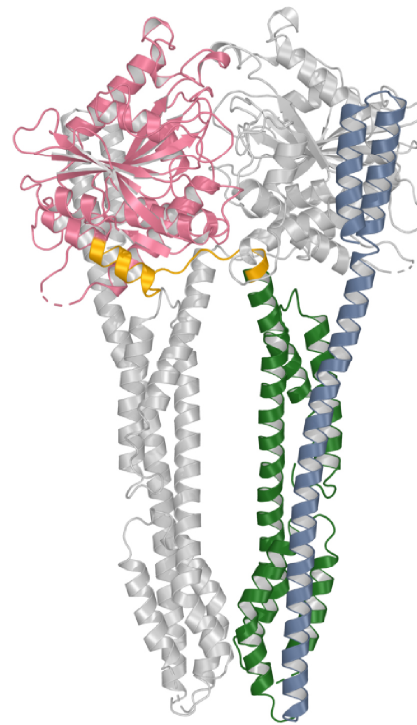**Model of GBP2<sup>FL</sup> dimer**

**Fig. S7.** Crystal Structure of hGBP2<sup>FL</sup> in nucleotide-free state and a model of hGBP2<sup>FL</sup> in nucleotide-bound state.

A) The crystal structure of hGBP2<sup>FL</sup> in its nucleotide-free state. LG domain, hinge region, MD and GED are depicted in pink, orange, green and blue, respectively. B) A model of hGBP2<sup>FL</sup> in its nucleotide-bound state based on the crystal structure of hGBP5<sub>1-486</sub> in complex with GDP·AlF<sub>3</sub>.

**Table S1.** Data Collection and Refinement Statistics.

|                                      | hGBP5 <sub>1-486</sub>    | hGBP5 <sub>1-486</sub> <sup>-</sup><br>GDP·AlF <sub>3</sub> | hGBP5 <sup>LG-</sup><br>GDP·AlF <sub>3</sub> | hGBP2 <sup>FL</sup>       |
|--------------------------------------|---------------------------|-------------------------------------------------------------|----------------------------------------------|---------------------------|
| <b>Data Collection</b>               |                           |                                                             |                                              |                           |
| Space group                          | P22121                    | P3221                                                       | P212121                                      | P212121                   |
| <b>Cell Dimensions</b>               |                           |                                                             |                                              |                           |
| a, b, c (Å)                          | 90.9, 137.3, 203.3        | 114.3, 114.3, 168.5                                         | 65.3, 79.3, 140.2                            | 42.2, 124.2, 355.7        |
| a, b, c (°)                          | 90.0, 90.0, 90.0          | 90.0, 90.0, 120.0                                           | 90.0, 90.0, 90.0                             | 90.0, 90.0, 90.0          |
| Resolution (Å)                       | 50.00-3.00<br>(3.05-3.00) | 50.00-2.50<br>(2.54-2.50)                                   | 50.00-2.28<br>(2.32-2.28)                    | 50.00-2.60<br>(2.64-2.60) |
| Unique reflections                   | 52289(2595)               | 44229(2199)                                                 | 33591(1654)                                  | 55672(2117)               |
| Completeness (%)                     | 100.0(100.0)              | 98.7(98.6)                                                  | 100.0(100.0)                                 | 92.4(70.8)                |
| R <sub>merge</sub>                   | 0.127(1.883)              | 0.123(1.294)                                                | 0.221(1.758)                                 | 0.151(1.325)              |
| I/σI                                 | 18.0(1.1)                 | 16.9(1.5)                                                   | 10.3(1.0)                                    | 10.6(1.3)                 |
| CC <sub>1/2</sub>                    | 0.998(0.592)              | 0.983(0.639)                                                | 0.999(0.634)                                 | 0.998(0.591)              |
| Redundancy                           | 9.1(9.0)                  | 9.1(7.9)                                                    | 12.7(12.6)                                   | 7.4(7.2)                  |
| <b>Refinement</b>                    |                           |                                                             |                                              |                           |
| Resolution (Å)                       | 48.22-3.00                | 49.48-2.50                                                  | 47.79-2.28                                   | 46.78-2.60                |
| Number of reflections                | 51718                     | 44127                                                       | 33531                                        | 55160                     |
| R <sub>work</sub> /R <sub>free</sub> | 0.220/0.260               | 0.211/0.250                                                 | 0.211/0.258                                  | 0.255/0.271               |
| Number of Atoms                      |                           |                                                             |                                              |                           |
| Protein                              | 13005                     | 7370                                                        | 4033                                         | 8838                      |
| Ligand/ion                           | 0                         | 66                                                          | 66                                           | 0                         |
| Water                                | 0                         | 110                                                         | 230                                          | 37                        |
| B-factors                            |                           |                                                             |                                              |                           |
| Protein                              | 107.85                    | 85.30                                                       | 45.65                                        | 71.83                     |
| Ligand/ion                           | -                         | 52.38                                                       | 39.65                                        | -                         |
| Water                                | -                         | 61.23                                                       | 47.82                                        | 56.98                     |
| RMSDs                                |                           |                                                             |                                              |                           |
| Bond lengths (Å)                     | 0.002                     | 0.003                                                       | 0.009                                        | 0.002                     |
| Bond angles (°)                      | 0.44                      | 0.64                                                        | 1.1                                          | 0.47                      |
| Ramachandran Statistics (%)          |                           |                                                             |                                              |                           |
| Favored                              | 95.0                      | 96.8                                                        | 96.6                                         | 99.2                      |
| Allowed                              | 5.0                       | 3.2                                                         | 3.4                                          | 0.8                       |
| Disallowed                           | 0.0                       | 0.0                                                         | 0.0                                          | 0.0                       |

Values in parentheses are for the highest-resolution shell.

**Table S2.** Primers used to generate pCG IRES BFP expression plasmids.

| <b>Construct name</b>  | <b>Primer name</b>         | <b>Primer sequence (5'-3')</b>                                           |
|------------------------|----------------------------|--------------------------------------------------------------------------|
| GBP2 wt                | GBP2 N-HA XbaI fw          | CTTCTAGACCATGTACCCA<br>TACGATGTTCCAGATTACG<br>CTGCTCCAGAGATCAACTT<br>GC  |
|                        | GBP2 MluI rev              | GAACGCGTTAGAGTATGTT<br>ACATATTGGCTCC                                     |
| GBP5 wt                | GBP5 N-HA XbaI fw          | CTTCTAGACCATGTACCCA<br>TACGATGTTCCAGATTACG<br>CTGCTTTAGAGATCCACAT<br>GTC |
|                        | GBP5 MluI rev              | CTACGCGTTTAGAGTAAAA<br>CACATGGATCATCGTTATT<br>AAC                        |
| GBP2 D306P             | GBP2 D306P rev             | ATGGCATTGACGTAGGTC                                                       |
|                        | GBP2 D306P fw              | CGGCAGTGGGCCTCTACCC<br>TGCA                                              |
| GBP2 D306A             | GBP2 D306A rev             | ATGGCATTGACGTAGGTCA<br>GCAC                                              |
|                        | GBP2 D306A fw              | CGGCAGTGGGGCTCTACCC<br>TGCA                                              |
| GBP2 L307A             | GBP2 L307A rev             | CTCCATGCAGGGTGCATCC<br>CCTACTGC                                          |
|                        | GBP2 L307A fw              | GCAGTGGGGATGCACCCTG<br>CATGGAG                                           |
| GBP2 P308A             | GBP2 P308A rev             | CGTTCTCCATGCAAGCTAG<br>ATCCCCAC                                          |
|                        | GBP2 P308A fw              | GTGGGGATCTAGCTTGCAT<br>GGAGAACG                                          |
| GBP2 L307A/P308A       | GBP2 L307A/P308A rev       | CGTTCTCCATGCAAGCTGC<br>ATCCCCACTGC                                       |
|                        | GBP2 L307A/P308A fw        | GCAGTGGGGATGCAGCTTG<br>CATGGAGAACG                                       |
| GBP2 D306A/L307A/P308A | GBP2 D306A/L307A/P308A rev | GCAGCCCCACTGCCGATGG<br>CATT                                              |
|                        | GBP2 D306A/L307A/P308A fw  | AGCTTGCATGGAGAACGCA<br>GTC                                               |
| GBP5 D306P             | GBP5 D306P rev             | ATGGCATTGACATAGGTC                                                       |
|                        | GBP5 D306P fw              | CAGCAGTGGGCCTCTGCCT<br>TGCATAG                                           |
| GBP5 D306A             | GBP5 D306A rev             | ATGGCATTGACATAGGTCA<br>GCAC                                              |
|                        | GBP5 D306A fw              | CAGCAGTGGGGCTCTGCCT<br>TGCA                                              |

| <b>Construct name</b>     | <b>Primer name</b>            | <b>Primer sequence (5'-3')</b>                             |
|---------------------------|-------------------------------|------------------------------------------------------------|
| GBP5 L307A                | GBP5 L307A rev                | CTCTATGCAAGGCGCATCC<br>CCTACTG                             |
|                           | GBP5 L307A fw                 | CAGTGGGGATGCGCCTTGC<br>ATAGAG                              |
| GBP5 P308A                | GBP5 P308A rev                | GCATTCTCTATGCAAGCCA<br>GATCCCCAC                           |
|                           | GBP5 P308A fw                 | GTGGGGATCTGGCTTGCAT<br>AGAGAATGC                           |
| GBP5 L307A/P308A          | GBP5 L307A/P308A rev          | GCATTCTCTATGCAAGCCG<br>CATCCCCACTGC                        |
|                           | GBP5 L307A/P308A fw           | GCAGTGGGGATGCGGCTTG<br>CATAGAGAATGC                        |
| GBP5<br>D306A/L307A/P308A | GBP5<br>D306A/L307A/P308A rev | GCAGCCCCACTGCTGATGG<br>CATT                                |
|                           | GBP5<br>D306A/L307A/P308A fw  | GGCTTGCATAGAGAATGCA<br>GTCC                                |
| GBP5 R356A                | GBP5 R356A rev                | CCCTCTCACTGGTAGCGTG<br>CAGGTCCAGC                          |
|                           | GBP5 R356A fw                 | GCTGGACCTGCACGCTACC<br>AGTGAGAGGG                          |
| GBP5 MDDM                 | GBP5 MDDM rev                 | CACTGCTTCTGCCAGAGG                                         |
|                           | GBP5 MDDM fw                  | CCTCTGGCAGAAGCAGTG                                         |
|                           | GBP5 MDDM rev                 | CCAGCACTTGCAGCCTCCG<br>CGGCCGCTAAATATTTTC                  |
|                           | GBP5 MDDM fw                  | GGAGGCTGCAAGTGCTGGA<br>ATATTAGCAGCTGACCAGG<br>GTCTCACAGAG  |
| GBP5 MDDM-A               | GBP5 MDDM-A rev               | GAATAAATTCCTGGGCCA<br>CTGCTTCGGCCAGAGGAC                   |
|                           | GBP5 MDDM-A fw                | GTCCTCTGGCCGAAGCAGT<br>GGCCCAGGGAATTTATTC                  |
| GBP5 MDDM-B               | GBP5 MDDM-B rev               | GTAATATTGCATGACTGGC<br>GGCCTCGGCGGCGGCTAAA<br>TATTTCTG     |
|                           | GBP5 MDDM-B fw                | CAGAAATATTTAGCCGCCG<br>CCGAGGCCCGCCAGTCATGC<br>AATATTAC    |
| GBP5 MDDM-C               | GBP5 MDDM-C rev               | GTCTCTGTGAGGCCCTGGT<br>CGGCGGCTAATATGCCGGC<br>ACTCACAGACTC |
|                           | GBP5 MDDM-C fw                | GAGTCTGTGAGTGCCGGCA<br>TATTAGCCGCCGACCAGGG<br>CCTCACAGAGAC |
| GBP5 MDDM-D               | GBP5 MDDM-D rev               | CATGACTCACAGACTCGGC<br>GGCGGCTAAATATTTCTG                  |



| <b>Construct name</b> | <b>Primer name</b> | <b>Primer sequence (5'-3')</b>                                    |
|-----------------------|--------------------|-------------------------------------------------------------------|
|                       | GBP5 MDDM-D fw     | CAGAAATATTTAGCCGCCG<br>CCGAGTCTGTGAGTCATG                         |
| GBP5 MDDM-E           | GBP5 MDDM-E rev    | GAATAAATTCCCTGGGCCA<br>CTGCTTCGGCCAGAGGAC                         |
|                       | GBP5 MDDM-E fw     | GTCCTCTGGCCGAAGCAGT<br>GGCCCAGGGAATTTATTC                         |
|                       | GBP5 MDDM-E rev    | CTGTAATATTGCGGCACTC<br>ACGGCCTCCTTGGAC                            |
|                       | GBP5 MDDM-E fw     | GTCCAAGGAGGCCGTGAGT<br>GCCGCAATATTACAG                            |
| GBP5 MDDM-F           | GBP5 MDDM-F rev    | GTCTCTGTGAGGCCCTGGT<br>CGGCGGCTAATATGCCATG<br>ACTGGCAGACTCCTTGGAC |
|                       | GBP5 MDDM-F fw     | GTCCAAGGAGTCTGCCAGT<br>CATGGCATATTAGCCGCCG<br>ACCAGGGCCTCACAGAGAC |

## SI References

1. E. Braun *et al.*, Guanylate-Binding Proteins 2 and 5 Exert Broad Antiviral Activity by Inhibiting Furin-Mediated Processing of Viral Envelope Proteins. *Cell Rep* **27**, 2092-2104.e2010 (2019).
2. H. Tian *et al.*, Structural basis of Zika virus helicase in recognizing its substrates. *Protein Cell* **7**, 562-570 (2016).
